# Supplementary material for: A study on the preparation of polycation gel polymer electrolyte for supercapacitors
Source: Royal Society of Chemistry journal article supplement (doi:10.1039/d1ra03488j), 2021-01-01
Supplement: d1ra03488j1.pdf [file d1ra03488j1.pdf]

## Supporting Information for

### A Study on the Preparation of Polycation Gel Polymer Electrolyte for Solid-State Supercapacitors

Hao Guo,<sup>a</sup> Longli Ma,<sup>b</sup> Chaojing Yan,<sup>b</sup> and Xiaohua Ma<sup>\*b</sup>

<sup>a</sup>Department of Chemistry, <sup>b</sup>Department of Materials Science, Fudan University,  
Shanghai 200433, China

E-mail: xhma@fudan.edu.cn

**Table S1.** The ionic conductivity of reported hydrogels <sup>1-9</sup> and PGPE of this work.

| Sample                                                             | Conductivity<br>(mS cm <sup>-1</sup> ) | Temperature | Ref. |
|--------------------------------------------------------------------|----------------------------------------|-------------|------|
| PAMPS/PAA                                                          | 3.34                                   | RT          | 1    |
| PAAm/Gelatin (15%Na <sub>3</sub> Cit)                              | 15                                     | RT          | 2    |
| PAM-AA/CNF/Fe <sup>3+</sup> (1.5%LiCl)                             | 22                                     | RT          | 3    |
| Chitosan+poly(diallyldimethylammonium<br>chloride) (KOH)           | 24                                     | 30 °C       | 4    |
| PVA (H <sub>3</sub> PO <sub>4</sub> )                              | 34                                     | 30 °C       | 5    |
| P(NVP-co-DMDAAC)/PVA (KOH)                                         | 36.6                                   | 25 °C       | 6    |
| B-PVA (GO + KCl)                                                   | 47.5                                   | RT          | 7    |
| This work                                                          | 57.6                                   | 25 °C       |      |
| C <sub>3</sub> (Br)DMAEMA/PEGMA (Li <sub>2</sub> SO <sub>4</sub> ) | 66.8                                   | 25 °C       | 8    |
| Carboxylated chitosan (HCl)                                        | 86.9                                   | RT          | 9    |

**Table S2.** Polymer system optimization.

| (EO) <sub>6</sub> (Cl)DMAEMA :<br>PEGMA(mass ratio) | Li <sub>2</sub> SO <sub>4</sub> /H <sub>2</sub> O<br>(mol L <sup>-1</sup> ) | Conductivity<br>(mS cm <sup>-1</sup> ) | Mechanical properties |
|-----------------------------------------------------|-----------------------------------------------------------------------------|----------------------------------------|-----------------------|
| 7:3                                                 | 0.5                                                                         | 47.8                                   | A little brittle      |
|                                                     | 1                                                                           | 50.4                                   | A little brittle      |
|                                                     | 1.5                                                                         | 40.2                                   | Brittle               |
|                                                     | 2                                                                           | 38.0                                   | Brittle               |
| 8:2                                                 | 0.5                                                                         | 53.3                                   | Stretchable           |
|                                                     | 1                                                                           | 57.6                                   | Stretchable           |
|                                                     | 1.5                                                                         | 47.5                                   | A little hard         |
|                                                     | 2                                                                           | 45.1                                   | Hard                  |
| 9:1                                                 | 0.5                                                                         | 52.7                                   | Stretchable           |
|                                                     | 1                                                                           | 56.4                                   | Stretchable           |
|                                                     | 1.5                                                                         | 44.9                                   | Hard                  |
|                                                     | 2                                                                           | 43.5                                   | Hard                  |

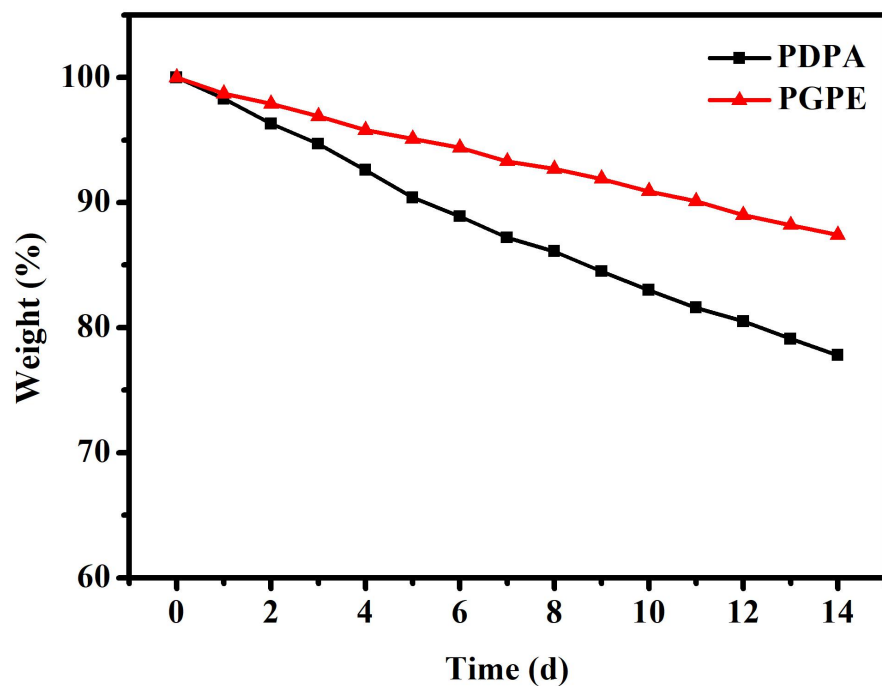

**Figure S1.** The liquid conservation rate of PGPE and PDPA within 2 weeks.

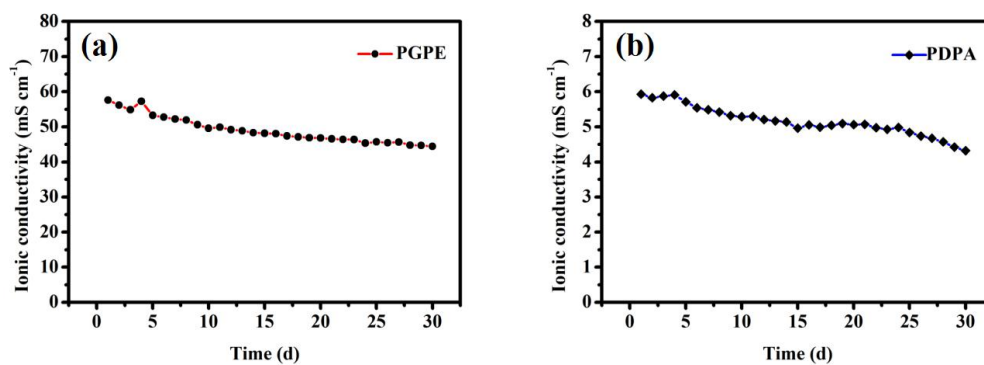

**Figure S2.** (a) Curve of ionic conductivity of PGPE within 30 days; (b) Curve of ionic conductivity of PDPA within 30 days.

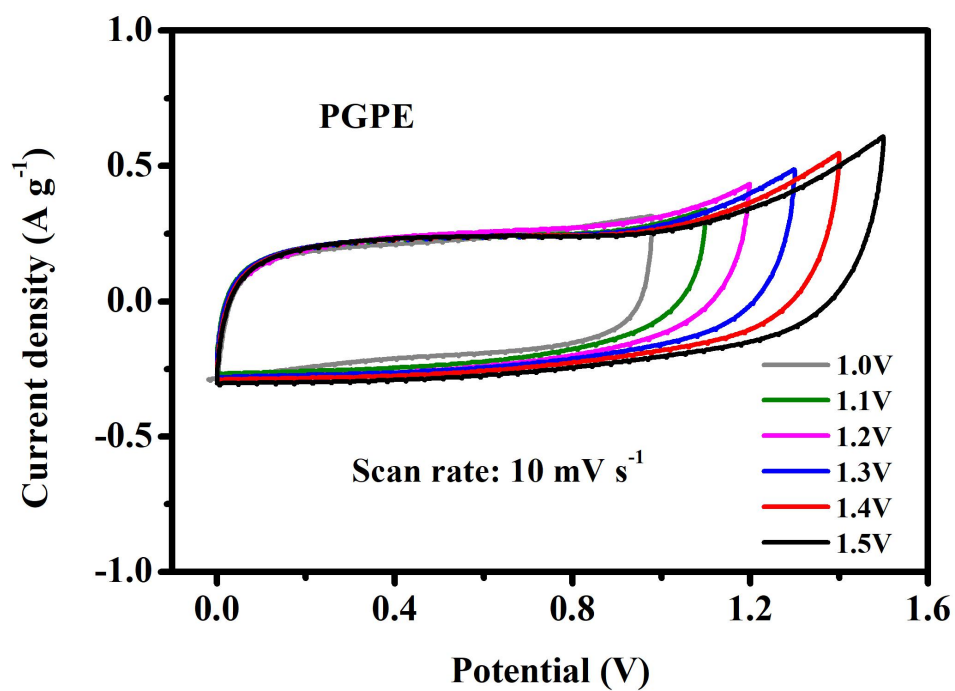

**Figure S3.** The potential window of PGPE SC.

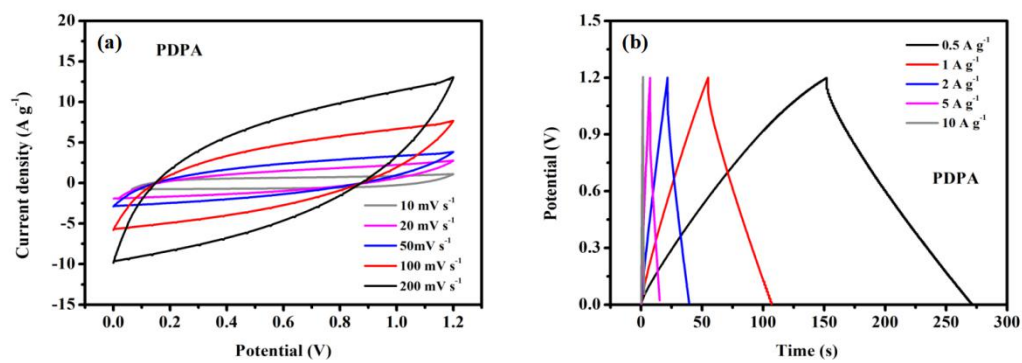

**Figure S4.** (a) CV curves of PDPA SC (scan rate from  $10 \text{ mV s}^{-1}$  to  $200 \text{ mV s}^{-1}$ ). (b) GCD curves of PDPA SC (current densities from  $0.5 \text{ A g}^{-1}$  to  $10 \text{ A g}^{-1}$ ).

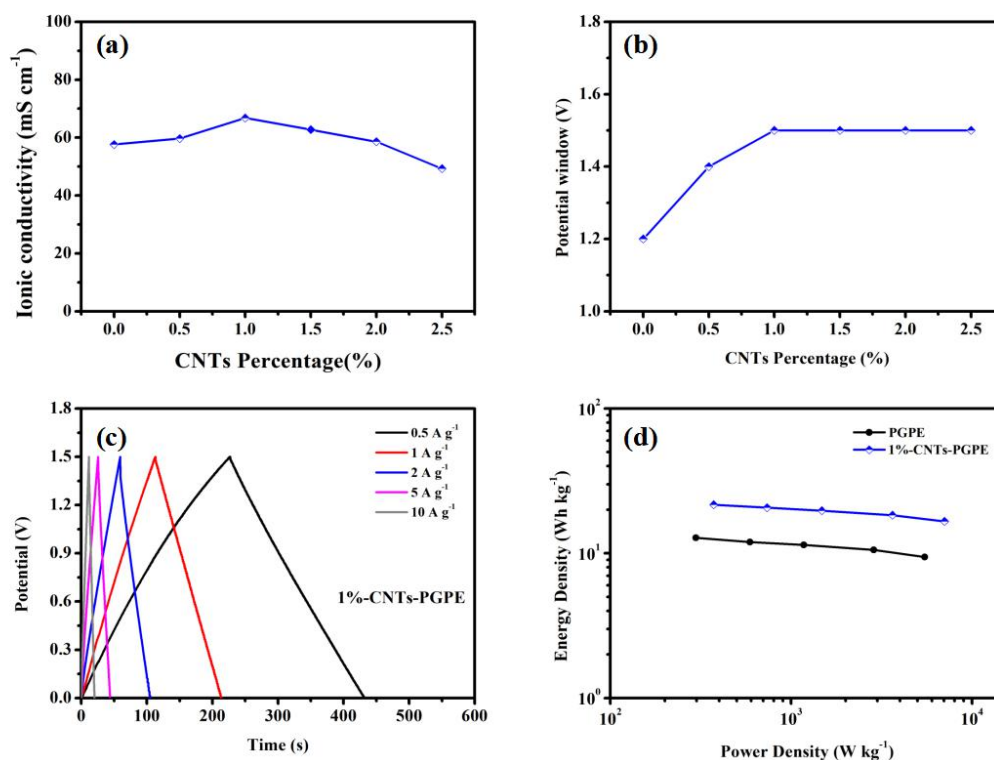

**Figure S5.** (a) The ionic conductivity of PGPE with different CNTs content at 25 °C. (b) The potential window of PGPE SC with different CNTs content. (c) GCD curves of PGPE SC and 1%-CNTs-PGPE SC at different current densities (from 0.5 to 10 A g<sup>-1</sup>). (d) Ragone plots of PGPE SC and 1%-CNTs-PGPE SC.

## References

1. C. W. Tu, F. C. Tsai, J. K. Chen, H. P. Wang, R. H. Lee, J. W. Zhang, T. Chen, C. C. Wang and C. F. Huang, *Polymers*, 2020, **12**, 2835.
2. X. Sun, F. L. Yao, C. Y. Wang, Z. H. Qin, H. T. Zhang, Q. Y. Yu, H. Zhang, X. R. Dong, Y. P. Wei and J. J. Li, *Macromolecular Rapid Communications*, 2020, **41**, 2000185.
3. L. H. Geng, S. S. Hu, M. Cui, J. M. Wu, A. Huang, S. Shi and X. F. Peng, *Carbohydrate Polymers*, 2021, **262**, 117936.
4. Y. A. Wei, M. Wang, N. N. Xu, L. W. Peng, J. F. Mao, Q. J. Gong and J. L. Qiao, *ACS applied materials & interfaces*, 2018, **10**, 29593-29598.
5. C. Zhao, C. Wang, Z. Yue, K. Shu and G. G. Wallace, *ACS applied materials & interfaces*, 2013, **5**, 9008-9014.
6. J. Wang, M. D. Deng, Y. H. Xiao, W. T. Hao and C. F. Zhu, *New Journal of Chemistry*, 2019, **43**, 4815-4822.

7. H. Peng, Y. Y. Lv, G. G. Wei, J. Z. Zhou, X. J. Gao, K. J. Sun, G. F. Ma and Z. Q. Lei, *Journal of Power Sources*, 2019, **431**, 210-219.
8. C. J. Yan, M. Y. Jin, X. X. Pan, L. L. Ma, X. H. Ma, *RSC Advances*, 2020, **10**, 9299.
9. H. Z. Yang, Y. Liu, L. B. Kong, L. Kang and F. Ran, *Journal of Power Sources*, 2019, **426**, 47-54.
